# Supplementary material for: Geometric and electronic structures of five-coordinate manganese(ii) “picket fence” porphyrin complexes
Source: Royal Society of Chemistry journal article supplement (doi:10.1039/c5dt00685f), 2015-01-01
Supplement: c5dt00685f1.pdf [file c5dt00685f1.pdf]

Geometric and Electronic Structures of Five-Coordinate Manganese(II) “Picket  
Fence” Porphyrin Complexes

**Supporting Information**

Qiang Yu, Yanhong Liu, Diansheng Liu, Jianfeng Li\*

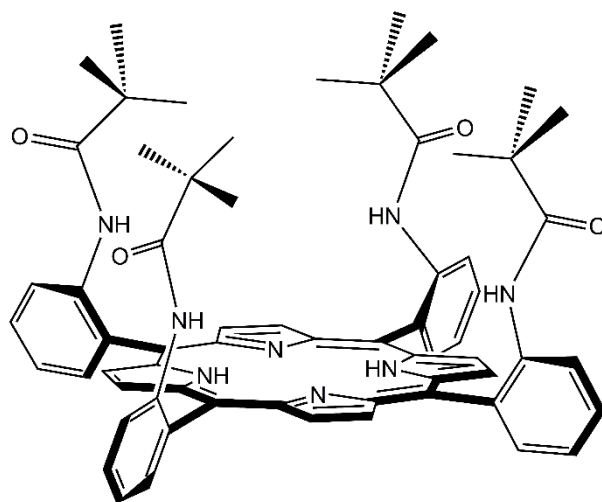

**Figure S1.**  $\alpha,\alpha,\alpha,\alpha$ -tetrakis(*o*-pivalamidophenyl)porphyrin

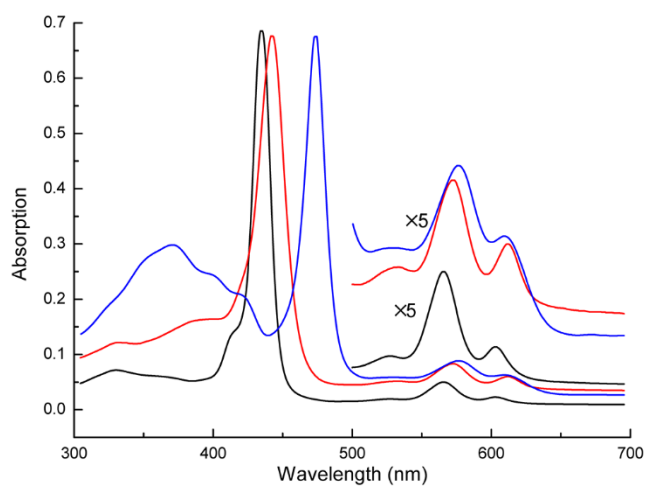

**Figure S2.** UV-vis spectrum of an anhydrous THF solution of [Mn(TpivPP)] (black line), [Mn(TpivPP)(1-MeIm)] (red line) and [Mn(TpivPP)]<sub>2</sub>O (blue line). The spectra from 500 to 700 nm are enlarged by 5 times.

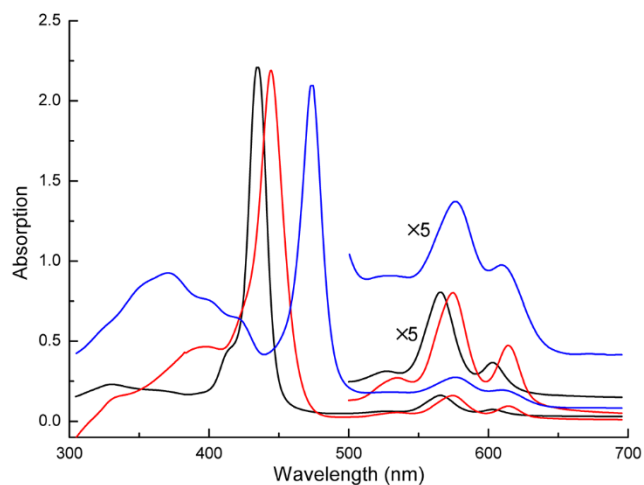

**Figure S3.** UV-vis spectrum of an anhydrous THF solution of  $[\text{Mn}(\text{TpivPP})]$  (black line),  $[\text{Mn}(\text{TpivPP})(1\text{-EtIm})]$  (red line) and  $[\text{Mn}(\text{TpivPP})]_2\text{O}$  (blue line). The spectra from 500 to 700 nm are enlarged by 5 times.

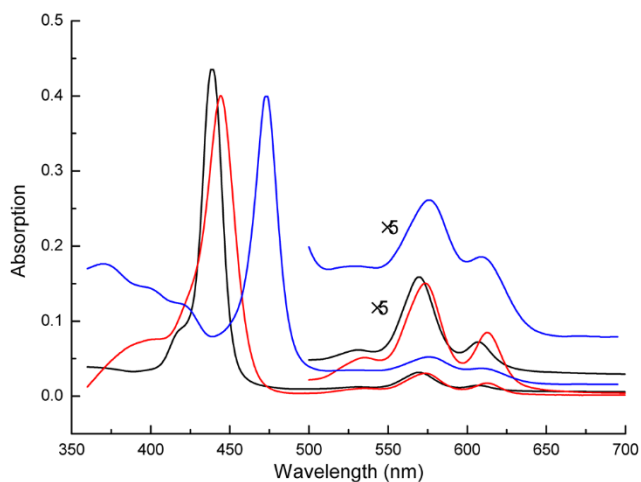

**Figure S4.** UV-vis spectrum of an anhydrous THF solution of  $[\text{Mn}(\text{TpivPP})]$  (black line),  $[\text{Mn}(\text{TpivPP})(2\text{-MeHIm})]$  (red line) and  $[\text{Mn}(\text{TpivPP})]_2\text{O}$  (blue line). The spectra from 500 to 700 nm are enlarged by 5 times.

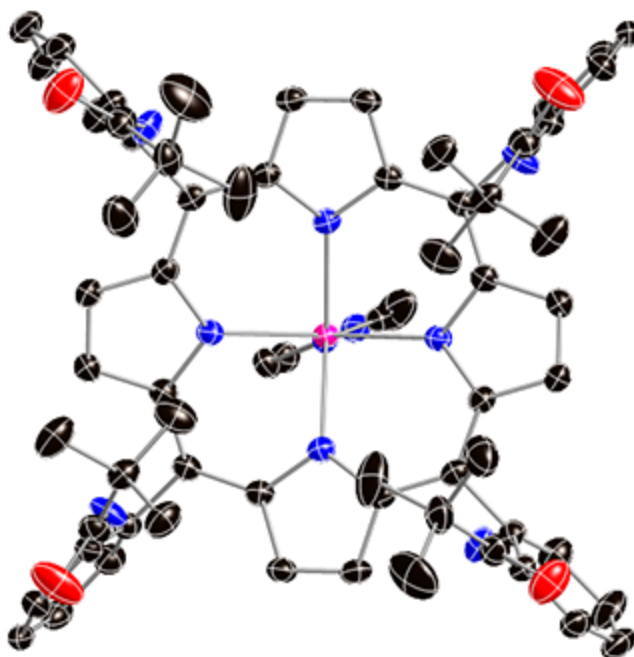

**Figure S5.** A top-down ORTEP diagram of [Mn(TpivPP)(1-MeIm)], Thermal ellipsoids are contoured at the 40% probability level. Hydrogen atoms omitted for clarity.

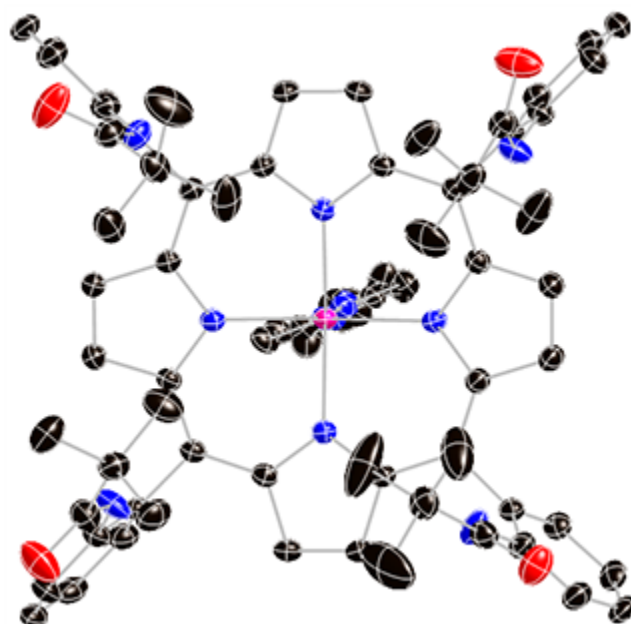

**Figure S6.** A top-down ORTEP diagram of [Mn(TpivPP)(1-EtIm)], Thermal ellipsoids are contoured at the 40% probability level. Hydrogen atoms omitted for clarity.

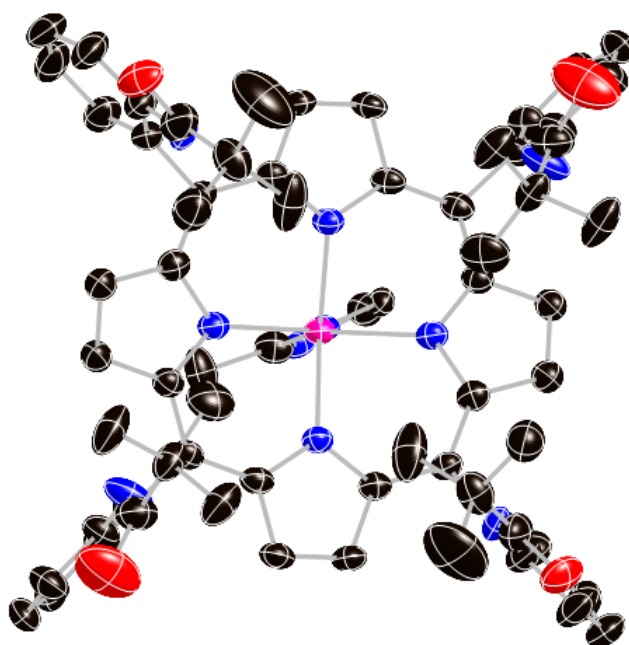

**Figure S7.** A top-down ORTEP diagram of  $[\text{Mn}(\text{TpivPP})(2\text{-MeHIm})]$ , Thermal ellipsoids are contoured at the 40% probability level. Hydrogen atoms omitted for clarity.

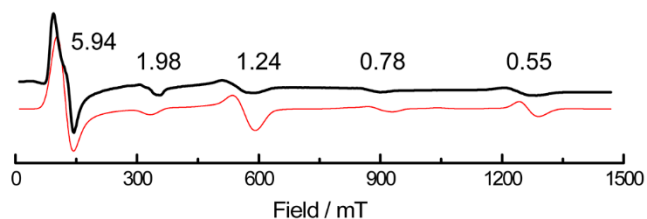

**Figure S8.** X-band EPR spectra (black line) and simulation (red line) of  $[\text{Mn}(\text{TpivPP})(1\text{-MeIm})]$  (a ground microcrystalline sample) at 90 K. EPR simulation conditions. (as follow)

Simulation conditions of X-band EPR spectra

$[\text{Mn}(\text{TpivPP})(1\text{-MeIm})]$  (powder) Simulation conditions:  $S = 2.5$ ,  $^{55}\text{Mn}$  hyperfine coupling,  $g = 1.98$ ,  $A_{\perp} = 210 \text{ MHz}$ ,  $A_{\parallel} = 270 \text{ MHz}$ ,  $D = 20250 \text{ MHz}$ ,  $E = 101.25 \text{ MHz}$ .

$[\text{Mn}(\text{TpivPP})(2\text{-MeHIm})]$  (powder) Simulation conditions:  $S = 2.5$ ,  $^{55}\text{Mn}$  hyperfine coupling,  $g = 1.98$ ,  $A_{\perp} = 220 \text{ MHz}$ ,  $A_{\parallel} = 260 \text{ MHz}$ ,  $D = 20800 \text{ MHz}$ ,  $E = 104 \text{ MHz}$ .

$[\text{Mn}(\text{TpivPP})(2\text{-MeHIm})]$  (solution) Simulation conditions:  $S = 2.5$ ,  $^{55}\text{Mn}$  hyperfine coupling,  $g = 1.98$ ,  $A_{\perp} = 220 \text{ MHz}$ ,  $A_{\parallel} = 260 \text{ MHz}$ ,  $D = 20200 \text{ MHz}$ ,  $E = 101 \text{ MHz}$ .
